# Supplementary material for: Temporal Trends and Recent Correlates in Sedentary Behaviors among Chinese Adults from 2002 to 2010–2012
Source: PubMed Central journal article supplement (PMC6982214; doi:10.3390/ijerph17010158), 2019-12-24
Supplement: ijerph-17-00158-s001.pdf [file ijerph-17-00158-s001.pdf]

# Supplementary materials

**Table S1.** Characteristics of the sample by gender and survey year [*n* (%)].

| Variables                              | 2002           |                | 2012           |                |
|----------------------------------------|----------------|----------------|----------------|----------------|
|                                        | Male           | Female         | Male           | Female         |
| Age group(year)                        |                |                |                |                |
| 18–29.9                                | 3618 (14.5)    | 4376 (15.8)    | 5006 (8.6)     | 8814 (12.0)    |
| 30–39.9                                | 5935 (23.8)    | 6999 (25.2)    | 7889 (13.5)    | 10,890 (14.9)  |
| 40–49.9                                | 5466 (21.9)    | 6188 (22.3)    | 13,064 (22.4)  | 16,746 (22.9)  |
| 50–59.9                                | 4934 (19.8)    | 5261 (19.0)    | 13,806 (23.7)  | 17,092 (23.3)  |
| ≥60                                    | 5007 (20.1)    | 4913 (17.7)    | 18,513 (31.8)  | 19,740 (26.9)  |
| Region                                 |                |                |                |                |
| Urban                                  | 8148 (32.6)    | 9310 (33.6)    | 28,214 (48.4)  | 37,005 (50.5)  |
| Rural                                  | 16,812 (67.4)  | 18,427 (66.4)  | 30,064 (51.6)  | 36,277 (49.5)  |
| Occupation                             |                |                |                |                |
| Employed                               | 7581 (30.4)    | 5044 (18.2)    | 18,183 (31.2)  | 13,731 (18.7)  |
| Farmers                                | 11,890 (47.6)  | 10,911 (39.3)  | 18,862 (32.4)  | 19,855 (27.1)  |
| Unemployed                             | 5489 (22.0)    | 11,782 (42.5)  | 21,233 (36.4)  | 39,696 (54.2)  |
| Marital Status                         |                |                |                |                |
| Yes                                    | 21,920 (87.8)  | 23,969 (86.4)  | 52,233 (89.6)  | 63,169 (86.2)  |
| No                                     | 3040 (12.2)    | 3768 (13.6)    | 6045 (10.4)    | 10,113 (13.8)  |
| Educational Level                      |                |                |                |                |
| Illiterate and primary school graduate | 8433 (33.8)    | 13,834 (49.9)  | 20,232 (34.7)  | 34,103 (46.5)  |
| Middle school graduate                 | 9825 (39.4)    | 8609 (31.0)    | 22,674 (38.9)  | 23,093 (31.5)  |
| High school graduate or higher         | 6702 (26.8)    | 5294 (19.1)    | 15,372 (26.4)  | 16,086 (22.0)  |
| Family's economic level                |                |                |                |                |
| Grade 1                                | 3577 (14.3)    | 3985 (14.4)    | 15,900 (27.3)  | 19,598 (26.7)  |
| Grade 2                                | 7423 (29.7)    | 8258 (29.8)    | 14,399 (24.7)  | 17,982 (24.5)  |
| Grade 3                                | 7224 (28.9)    | 8071 (29.1)    | 11,114 (19.1)  | 14,111 (19.3)  |
| Grade 4                                | 4311 (17.3)    | 4739 (17.1)    | 10,542 (18.1)  | 13,383 (18.3)  |
| Grade 5                                | 2425 (9.7)     | 2684 (9.7)     | 6323 (10.8)    | 8208 (11.2)    |
| Total                                  | 24,960 (100.0) | 27,737 (100.0) | 58,278 (100.0) | 73,282 (100.0) |

**Table S2.** Changes <sup>§</sup>(means) and absolute differences in time of sedentary behaviors (SB) from 2002 to 2010–2012 (hours per day).

| Variables                              | Total SB |           |                 | Leisure Time SB |           |                 | Occupational SB <sup>#</sup> |           |                 |
|----------------------------------------|----------|-----------|-----------------|-----------------|-----------|-----------------|------------------------------|-----------|-----------------|
|                                        | 2002     | 2010–2012 | D <sup>##</sup> | 2002            | 2010–2012 | D <sup>##</sup> | 2002                         | 2010–2012 | D <sup>##</sup> |
| Total                                  | 3.71     | 4.01      | +0.29 **        | 2.57            | 2.71      | +0.14 **        | 4.41                         | 4.02      | -0.39 **        |
| Gender                                 |          |           |                 |                 |           |                 |                              |           |                 |
| Female                                 | 3.32     | 3.72      | +0.41 **        | 2.40            | 2.67      | +0.27 **        | 4.58                         | 4.34      | -0.24 **        |
| Male                                   | 4.10     | 4.28      | +0.18**         | 2.73            | 2.75      | +0.01 **        | 4.30                         | 3.83      | -0.48 **        |
| Age group(year)                        |          |           |                 |                 |           |                 |                              |           |                 |
| 18–29.9                                | 4.66     | 4.78      | +0.12 **        | 3.03            | 2.92      | -0.11 **        | 4.32                         | 4.15      | -0.17 **        |
| 30–39.9                                | 4.05     | 4.47      | +0.42 **        | 2.52            | 2.60      | +0.08 **        | 4.50                         | 4.14      | -0.36 **        |
| 40–49.9                                | 3.85     | 3.94      | +0.09 **        | 2.47            | 2.57      | +0.10 **        | 4.43                         | 3.86      | -0.57 **        |
| 50–59.9                                | 3.04     | 3.42      | +0.38 **        | 2.40            | 2.64      | +0.24 **        | 4.40                         | 3.69      | -0.71 **        |
| ≥60                                    | 2.30     | 2.88      | +0.58 **        | 2.20            | 2.75      | +0.56 **        | 4.64                         | 3.33      | -1.30 **        |
| Region                                 |          |           |                 |                 |           |                 |                              |           |                 |
| Urban                                  | 5.11     | 4.76      | -0.35 **        | 3.24            | 2.88      | -0.36 **        | 4.47                         | 4.29      | -0.18 **        |
| Rural                                  | 3.04     | 3.31      | +0.26 **        | 2.25            | 2.55      | +0.30 **        | 4.34                         | 3.51      | -0.83 **        |
| Occupation                             |          |           |                 |                 |           |                 |                              |           |                 |
| Employed                               | 7.52     | 6.61      | -0.91 **        | 3.14            | 2.59      | -0.54 **        | 4.41                         | 4.02      | -0.39 **        |
| Farmers                                | 2.04     | 2.40      | +0.36 **        | 2.04            | 2.40      | +0.36 **        | /                            | /         | /               |
| Unemployed                             | 2.81     | 3.01      | +0.20 **        | 2.81            | 3.01      | +0.20 **        | /                            | /         | /               |
| Marital Status                         |          |           |                 |                 |           |                 |                              |           |                 |
| Yes                                    | 3.62     | 3.88      | +0.26 **        | 2.50            | 2.65      | +0.14 **        | 4.44                         | 3.99      | -0.44 **        |
| No                                     | 4.09     | 4.59      | +0.49 **        | 2.83            | 2.98      | +0.16 **        | 4.32                         | 4.10      | -0.22 *         |
| Educational Level                      |          |           |                 |                 |           |                 |                              |           |                 |
| Illiterate and primary school graduate | 2.15     | 2.93      | +0.79 **        | 1.87            | 2.53      | +0.66 **        | 3.97                         | 3.21      | -0.76 **        |
| Middle school graduate                 | 3.66     | 3.82      | +0.16 **        | 2.66            | 2.72      | +0.06 **        | 4.18                         | 3.57      | -0.62 **        |
| High school graduate or higher         | 6.26     | 5.51      | -0.74 **        | 3.52            | 2.90      | -0.62 **        | 4.63                         | 4.56      | -0.07 **        |
| Family's economic level                |          |           |                 |                 |           |                 |                              |           |                 |
| Grade 1                                | 2.19     | 3.14      | +0.95 **        | 1.93            | 2.53      | +0.59 **        | 3.85                         | 3.37      | -0.48 **        |
| Grade 2                                | 2.75     | 3.65      | +0.89 **        | 2.23            | 2.66      | +0.43 **        | 4.28                         | 3.57      | -0.71 **        |
| Grade 3                                | 3.78     | 4.14      | +0.35 **        | 2.57            | 2.76      | +0.19 **        | 4.28                         | 3.89      | -0.39 **        |
| Grade 4                                | 5.26     | 4.69      | -0.57 **        | 3.14            | 2.85      | -0.29 **        | 4.40                         | 4.35      | -0.05 **        |
| Grade 5                                | 6.14     | 5.49      | -0.65 **        | 3.59            | 2.91      | -0.68 **        | 4.84                         | 4.75      | -0.09 **        |

<sup>§</sup>gender and age standardized to the 2010 China census population; <sup>#</sup> Time of Occupational SB was only calculated in employed participants,  $n_{2002} = 12,625$ ,  $n_{2010-2012} = 31,914$ ; <sup>##</sup> D for Difference; + = increase; - = decrease; \*\*  $p < 0.001$ , \*  $p < 0.05$ , significance is based on T-Tests.

**Table S3.** Correlates <sup>§</sup> of total SB time  $\geq 4$  h/d, leisure SB time  $\geq 3$  h/d, and occupational SB <sup>#</sup> time  $\geq 4$  h/d among Chinese adults in 2010–2012 (economic missing cases included,  $n = 139,925$ ).

| Independent Variables                  | OR (95% CI)                |                              |                                                |
|----------------------------------------|----------------------------|------------------------------|------------------------------------------------|
|                                        | Total SB time $\geq 4$ h/d | Leisure SB time $\geq 3$ h/d | Occupational SB <sup>#</sup> time $\geq 4$ h/d |
| Gender                                 |                            |                              |                                                |
| Female                                 | 1.0                        | 1.0                          | 1.0                                            |
| Male                                   | 1.11 (1.10–1.11)           | 1.27 (1.27–1.28)             | 0.74 (0.74–0.74)                               |
| Age group (year)                       |                            |                              |                                                |
| 18–29.9                                | 1.0                        | 1.0                          | 1.0                                            |
| 30–39.9                                | 0.78 (0.77–0.78)           | 0.75 (0.74–0.75)             | 1.03 (1.03–1.03)                               |
| 40–49.9                                | 0.73 (0.73–0.74)           | 0.76 (0.76–0.76)             | 0.95 (0.95–0.95)                               |
| 50–59.9                                | 0.68 (0.68–0.68)           | 0.72 (0.72–0.72)             | 0.90 (0.89–0.90)                               |
| $\geq 60$                              | 0.75 (0.75–0.75)           | 0.69 (0.68–0.69)             | 1.01 (1.00–1.01)                               |
| Region                                 |                            |                              |                                                |
| Rural                                  | 1.0                        | 1.0                          | 1.0                                            |
| Urban                                  | 1.26 (1.26–1.26)           | 1.12 (1.12–1.12)             | 1.32 (1.31–1.32)                               |
| Occupation                             |                            |                              |                                                |
| Unemployed                             | 1.0                        | 1.0                          | /                                              |
| Farmers                                | 0.52 (0.52–0.52)           | 0.65 (0.65–0.66)             | /                                              |
| Employed                               | 9.64 (9.63–9.64)           | 0.55 (0.55–0.55)             | /                                              |
| Marital Status                         |                            |                              |                                                |
| Yes                                    | 1.0                        | 1.0                          | 1.0                                            |
| No                                     | 1.28 (1.27–1.28)           | 1.29 (1.28–1.29)             | 0.90 (0.89–0.90)                               |
| Educational Level                      |                            |                              |                                                |
| Illiterate and primary school graduate | 1.0                        | 1.0                          | 1.0                                            |
| Middle school graduate                 | 1.11 (1.10–1.11)           | 1.20 (1.19–1.20)             | 1.26 (1.25–1.26)                               |
| High school graduate or higher         | 1.53 (1.53–1.53)           | 1.35 (1.35–1.36)             | 2.50 (2.49–2.50)                               |
| Family's economic level                |                            |                              |                                                |
| Grade 1                                | 1.0                        | 1.0                          | 1.0                                            |
| Grade 2                                | 1.12 (1.11–1.12)           | 1.16 (1.16–1.16)             | 1.15 (1.14–1.15)                               |
| Grade 3                                | 1.26 (1.26–1.27)           | 1.21 (1.20–1.21)             | 1.34 (1.33–1.34)                               |
| Grade 4                                | 1.46 (1.45–1.46)           | 1.31 (1.30–1.31)             | 1.71 (1.71–1.72)                               |
| Grade 5                                | 1.64 (1.64–1.65)           | 1.36 (1.36–1.36)             | 2.11 (2.11–2.12)                               |
| Unknown                                | 1.19 (1.19–1.20)           | 1.09 (1.09–1.09)             | 1.74 (1.73–1.74)                               |

<sup>§</sup>gender and age standardized to the 2010 China census population; <sup>#</sup>Time of occupational SB was only calculated in employed participants,  $n = 34,394$ .
